# Supplementary material for: A microRNA negative feedback loop downregulates vesicle transport and inhibits fear memory
Source: eLife journal article supplement (doi:10.7554/elife.22467), 2016-12-21
Supplement: supp [file elife-22467-supp-v2.zip]

**Supplementary file 1B.** List of targets from the vesicle exocytosis pathway with predicted binding sites for 3 or more fear-induced miRNAs. The miRNAs that co-regulate each gene are listed underneath the gene name.

|                     |                   |                    |                    |                      |
|---------------------|-------------------|--------------------|--------------------|----------------------|
| <b><u>Apba1</u></b> | <b><u>Bsn</u></b> | <b><u>Erc1</u></b> | <b><u>Pclo</u></b> | <b><u>Ppfia2</u></b> |
| let-7f              | let-7f            | miR-29b            | miR-27b            | miR-15a              |
| miR-9               | miR-30e           | miR-29c            | miR-153            | miR-27b              |
| miR-30e             | miR-153           | miR-130a           | miR-203            | miR-30e              |
|                     | miR-218           |                    | miR-218            | miR-130a             |

|                      |                      |                      |                     |                      |
|----------------------|----------------------|----------------------|---------------------|----------------------|
| <b><u>Rph3al</u></b> | <b><u>Slc1a2</u></b> | <b><u>Snap25</u></b> | <b><u>Stx1a</u></b> | <b><u>Stxbp5</u></b> |
| miR-15a              | miR-30e              | miR-27b              | miR-9               | let-7f               |
| miR-130a             | miR-153              | miR-130a             | miR-27b             | miR-30e              |
| miR-153              | miR-203              | miR-153              | miR-29b             | miR-218              |
| miR-218              |                      |                      | miR-29c             |                      |

|                    |                    |                     |                     |                     |
|--------------------|--------------------|---------------------|---------------------|---------------------|
| <b><u>Syt1</u></b> | <b><u>Syt4</u></b> | <b><u>Trak2</u></b> | <b><u>Vamp1</u></b> | <b><u>Vamp3</u></b> |
| let-7f             | miR-9              | miR-29              | miR-9               | miR-9               |
| miR-153            | miR-15             | miR-153             | miR-15a             | miR-30e             |
| miR-218            | miR-153            | miR-181a            | miR-181a            | miR-181a            |
|                    |                    | miR-181b            | miR-181b            | miR-181b            |
|                    |                    |                     |                     | miR-338-3p          |
