# Supplementary material for: A microRNA negative feedback loop downregulates vesicle transport and inhibits fear memory
Source: eLife journal article supplement (doi:10.7554/elife.22467), 2016-12-21
Supplement: supp [file elife-22467-supp-v2.zip]

**Supplementary file 1C.** List of targets from each of the top five networks (axon guidance, long-term potentiation, synaptic contact, synaptogenesis, and vesicle exocytosis pathways) with predicted binding sites for miR-153. Genes from the vesicle exocytosis pathway that are co-regulated by miR-153 together with other fear-induced miRNAs are presented in Figure 1E.

| <u><b>Axon Guidance</b></u> | <u><b>LTP</b></u> | <u><b>Synaptic Contact</b></u> | <u><b>Synaptogenesis</b></u> | <u><b>Vesicle Exocytosis</b></u> |
|-----------------------------|-------------------|--------------------------------|------------------------------|----------------------------------|
| Adam23                      | Src               | Cask                           | Bsn                          | Bsn                              |
| Calm1                       | Calm1             | Dlg2                           | Cask                         | Cltc                             |
| Cacna1c                     | Grb2              | Efnb2                          | Dlg2                         | Itsn2                            |
| Dcc                         | Pik3r1            | Fyn                            | Efnb2                        | Pclo                             |
| Efnb2                       | Prkar2b           | Grik2                          | Grik2                        | Rph3al                           |
| Fyn                         | Plcb1             | Grip2                          | Grik3                        | Slc1a2                           |
| Prkar2b                     | Ryr2              | Nfasc                          | Scn8a                        | Snap25                           |
| Robo2                       | Ryr3              | Snap25                         | Pclo                         | Snca                             |
| Ryr2                        |                   | Wipf1                          |                              | Syt1                             |
|                             |                   |                                |                              | Syt4                             |
|                             |                   |                                |                              | Trak2                            |
|                             |                   |                                |                              | Vamp2                            |
