# Supplementary material for: A microRNA negative feedback loop downregulates vesicle transport and inhibits fear memory
Source: eLife journal article supplement (doi:10.7554/elife.22467), 2016-12-21
Supplement: supp [file elife-22467-supp-v2.zip]

**Supplementary file 1A.** List of 353 targets with predicted binding sites for 3 or more of the fear-induced miRNAs.

**Gene symbols**

|               |               |         |           |          |          |         |         |
|---------------|---------------|---------|-----------|----------|----------|---------|---------|
| 0610007L01Rik | Bcl2l11       | E2f3    | Hipk3     | Mllt3    | Rbm47    | Socs7   | Ypel2   |
| 1110067D22Rik | Bcl7a         | Ebf3    | Hlf       | Msi2     | Rc3h1    | Sos1    | Ythdf2  |
| 1200014J11Rik | Bend3         | Efnb2   | Hmga2     | Mtmr12   | Ret      | Sp1     | Yy1     |
| 1300001I01Rik | Birc6         | Eif2c3  | Hnrnpa2b1 | Naa15    | Rfx3     | Specc1l | Zbtb34  |
| 4933433P14Rik | Bmi1          | Eif4e3  | Hs3st3b1  | Nbea     | Rfx7     | Spire1  | Zbtb39  |
| A930001N09Rik | Braf          | Elavl4  | Igf2bp1   | Neddd4l  | Rgs7bp   | Spty2d1 | Zbtb41  |
| Aak1          | Brpf3         | Ell2    | Igf2bp3   | Nfat5    | Rlim     | St8sia4 | Zcchc14 |
| Abl2          | Bsn           | Eml5    | Ikzf4     | Nfia     | Rmnd5a   | Strbp   | Zdhhc20 |
| Accn2         | C130039O16Rik | En2     | Inhbb     | Nfib     | Rnf150   | Stxbp5  | Zdhhc21 |
| Acs14         | C77370        | Epc2    | Ino80     | Nhlh2    | Rnf165   | Synj1   | Zdhhc5  |
| Adam23        | Camk4         | Epha7   | Ipo8      | Nlk      | Rnf38    | Sypl    | Zeb2    |
| Adamts3       | Camta1        | Esrrg   | Kcnh1     | Nmnat2   | Robo2    | Tada2b  | Zfhx4   |
| Adipor2       | Capza1        | Ets1    | Kcnmb2    | Nova1    | Rorb     | Tanc2   | Zfp236  |
| Afap1         | Cask          | Faf2    | Kcnq5     | Nufip2   | Rtf1     | Taok1   | Zfp238  |
| Agap1         | Cbfa2t3       | Fam126b | Kif1b     | Onecut2  | Runx1    | Tbc1d8  | Zfp361l |
| Agps          | Cbx5          | Fam178a | Klf12     | Osblp3   | Runx1t1  | Tcf4    | Zfp385c |
| Ak4           | Ccdc6         | Fam196a | Klhl29    | Osblp6   | Runx2    | Tet3    | Zfp462  |
| Amot          | Ccdc85a       | Fam196b | Lats1     | Palm2    | Sall4    | Tgfb2   | Zfp609  |
| Ank3          | Ccdc88a       | Fat3    | Lhfp      | Pbrm1    | Samd8    | Thoc2   | Zfp697  |
| Ankrd13b      | Cdk8          | Fbln5   | Lin28b    | Pclo     | Scai     | Thsd7a  | Zfp704  |
| Ankrd52       | Cecr2         | Fbxl17  | Lin7a     | Pdcd6ip  | Scn3a    | Timp2   | Zfyve20 |
| Ap4e1         | Chic1         | Fbxo28  | Lin7c     | Pde7a    | Scn8a    | Tmem33  | Zmynd11 |
| Apba1         | Clock         | Fbxo33  | Lmx1a     | Pdgfra   | Sdc2     | Tmtc2   | Znrf3   |
| Api5          | Cnot2         | Fgf9    | Lphn1     | Phactr2  | Sema6a   | Tnrc6b  | Zzz3    |
| Appl1         | Cnr1          | Flrt3   | Lpp       | Phf13    | Sept11   | Tox3    |         |
| Arcn1         | Cntn4         | Fmr1    | Lrba      | Phf15    | Sept8    | Tpm3    |         |
| Arf6          | Cpeb2         | Foxp2   | Maf       | Phf20l1  | Serinc5  | Traf3   |         |
| Arhgef12      | Ctdspl        | Frmd6   | Magi2     | Pi4k2a   | Setbp1   | Trim33  |         |
| Arid1b        | D3Bwg0562e    | Fsd1l   | Man2a1    | Pip4k2b  | Setd7    | Trim71  |         |
| Arid4b        | D430041D05Rik | Fyco1   | Map3k2    | Plcl2    | Sfmbt1   | Trip12  |         |
| Arx           | D630045J12Rik | Gab2    | Mapk10    | Ppargc1a | Sgms2    | Trps1   |         |
| Asph          | Dcbl2         | Gabrb2  | Mapre1    | Ppfia2   | Sh3pxd2a | Tsc22d2 |         |
| Asx13         | Dcc           | Gdnf    | Mar4      | Prickle2 | Shoc2    | Ttbk2   |         |
| Atf2          | Dclk1         | Glecl1  | Marcks    | Prrx1    | Sik1     | Ttc14   |         |
| Atg14         | Dcpl1a        | Glce    | Mast4     | Psd2     | Sirt1    | Ube2h   |         |
| Atp2b1        | Dcp2          | Gli3    | Mbnl1     | Pten     | Slc12a2  | Ube2i   |         |
| Atp8b2        | Dcun1d3       | Gm2058  | Mcc       | Ptp4a1   | Slc16a10 | Ubfd1   |         |
| Atrn          | Dcx           | Gnaq    | Mdga2     | Ptpg     | Slc22a23 | Ubn2    |         |
| Atxn1         | Ddx3x         | Gng12   | Mecp2     | Qk       | Slc24a2  | Ubxn7   |         |
| B230219D22Rik | Derl2         | Gpr153  | Med12l    | Qser1    | Slc30a7  | Unc13a  |         |
| B630005N14Rik | Dlg2          | Grik2   | Mef2c     | Rab15    | Slc38a4  | Unkl    |         |
| Bach2         | Dnajc3        | Grik3   | Mfap3l    | Rab40b   | Slc39a1  | Usp31   |         |
| Bahd1         | Dnalcl        | Grm1    | Mga       | Rap1b    | Slc39a9  | Usp42   |         |
| Baz2a         | Dnmt3a        | Gsel    | Mier3     | Rapgef2  | Slc7a11  | Vat1    |         |
| Bcl11a        | Dnmt3b        | Hapln1  | Mink1     | Rasgrf2  | Slc8a1   | Vav3    |         |
| Bcl11b        | Dolpp1        | Has3    | Mll1      | Rassf10  | Smoc2    | Wipf1   |         |
| Bcl2          | Dpysl2        | Hic2    | Mll2      | Rbfox2   | Socs6    | Wipi2   |         |
